# Supplementary material for: Stress-responsive rhodamine bioconjugates for membrane-potential-independent mitochondrial live-cell imaging and tracking
Source: Royal Society of Chemistry journal article supplement (doi:10.1039/d1ob01741a), 2021-01-01
Supplement: d1ob01741a1.pdf [file d1ob01741a1.pdf]

# Stress-Responsive Rhodamine Bioconjugates for Membrane-Potential-Independent Mitochondrial Live-Cell Imaging and Tracking

Tarushyam Mukherjee<sup>a</sup>, Ramprasad Regar<sup>a</sup>, Virupakshi Soppina<sup>b</sup> and Sriram Kanvah<sup>a\*</sup>

<sup>a</sup>Discipline of Chemistry, Indian Institute of Technology Gandhinagar, Palaj, Gujarat 382355, India. E-mail: sriram@iitgn.ac.in ; [kanvah@gmail.com](mailto:kanvah@gmail.com)

<sup>b</sup>Discipline of Biological Engineering, Indian Institute of Technology Gandhinagar, Palaj, Gandhinagar 382355, India. E-mail: [vsoppina@iitgn.ac.in](mailto:vsoppina@iitgn.ac.in)

**Table S1.** Current state of the art (Steroid conjugate moieties for cellular imaging).

| <i>Important Sterol Probes</i>    | <i>Synthetic challenges</i> | <i>Optical Properties</i>                                                           | <i>Use</i>                                                                                                                                 |
|-----------------------------------|-----------------------------|-------------------------------------------------------------------------------------|--------------------------------------------------------------------------------------------------------------------------------------------|
| <i>Quinoline sterol conjugate</i> | Multiple steps              | Excitation laser used for cell imaging 403 nm                                       | Anticancer agent turned into imaging agent, Endoplasmic reticulum imaging <sup>1</sup>                                                     |
| <i>BODIPY Cholesterol Probes</i>  | 9 steps or more             | Excitation: ~580 nm<br>Emission: ~610 nm                                            | Cholesterol transport in living cells <sup>2</sup><br>Membrane order determination in model membranes.                                     |
| <i>NBD cholesterol Probes</i>     | 5 steps                     | Smaller Stokes' shift<br>Excitation: ~470 nm<br>Emission: ~530 nm                   | Membrane order determination using model membrane <sup>3</sup><br>ACAT activity in living cells.                                           |
| <i>Dansyl Cholesterol probes</i>  | 5 steps                     | Smaller Stokes' shift<br>Excitation: ~350 nm<br>Emission: ~520 nm                   | Intracellular transport of cholesterol from plasma membrane <sup>4</sup>                                                                   |
| <i>Dansyl Cortisol</i>            | 1 step                      | Absorption maxima: ~350 nm<br>Emission maxima ~500 nm <sup>5</sup>                  | core-shell-type molecularly imprinted polymer nanoparticles (MIP-NPs) for cortisol sensing <sup>6</sup> .<br>No cellular studies reported. |
| <i>Pyridinium cholesterol</i>     | 3 steps                     | Excitation: ~450 nm<br>Emission: ~600 nm<br>Large Stokes' shift                     | Cell membrane imaging and also enables liposome interaction <sup>7</sup>                                                                   |
| <i>Current study</i>              | 1 step                      | Excitation: 561 nm laser<br>Emission: ~590 nm<br>No bleed through in other channels | Mitochondrial imaging with mapping of stressed mitochondrial cells.                                                                        |

| Solvents     | RC1                            |                                |                                       |          | RC2                            |                                |                                       |          |
|--------------|--------------------------------|--------------------------------|---------------------------------------|----------|--------------------------------|--------------------------------|---------------------------------------|----------|
|              | $\lambda_{\text{abs}}$<br>(nm) | $\lambda_{\text{emi}}$<br>(nm) | Stokes' Shift<br>( $\text{cm}^{-1}$ ) | $\Phi_f$ | $\lambda_{\text{abs}}$<br>(nm) | $\lambda_{\text{emi}}$<br>(nm) | Stokes' Shift<br>( $\text{cm}^{-1}$ ) | $\Phi_f$ |
| Dioxane      | 564                            | 587                            | 695                                   | 0.20     | 562                            | 588                            | 787                                   | 0.37     |
| DMF          | 562                            | 589                            | 816                                   | 0.41     | 563                            | 589                            | 784                                   | 0.47     |
| THF          | 559                            | 584                            | 766                                   | 0.59     | 560                            | 584                            | 734                                   | 0.62     |
| Acetonitrile | 556                            | 583                            | 833                                   | 0.32     | 557                            | 581                            | 742                                   | 0.39     |
| Methanol     | 555                            | 580                            | 777                                   | 0.42     | 556                            | 578                            | 685                                   | 0.53     |
| DMSO         | 566                            | 593                            | 804                                   | 0.48     | 567                            | 592                            | 745                                   | 0.58     |
| Water        | 560                            | 585                            | 763                                   | 0.006    | 561                            | 593                            | 962                                   | 0.29     |

**Table S2.** Photophysical properties of **RC1** and **RC2** in different solvents.

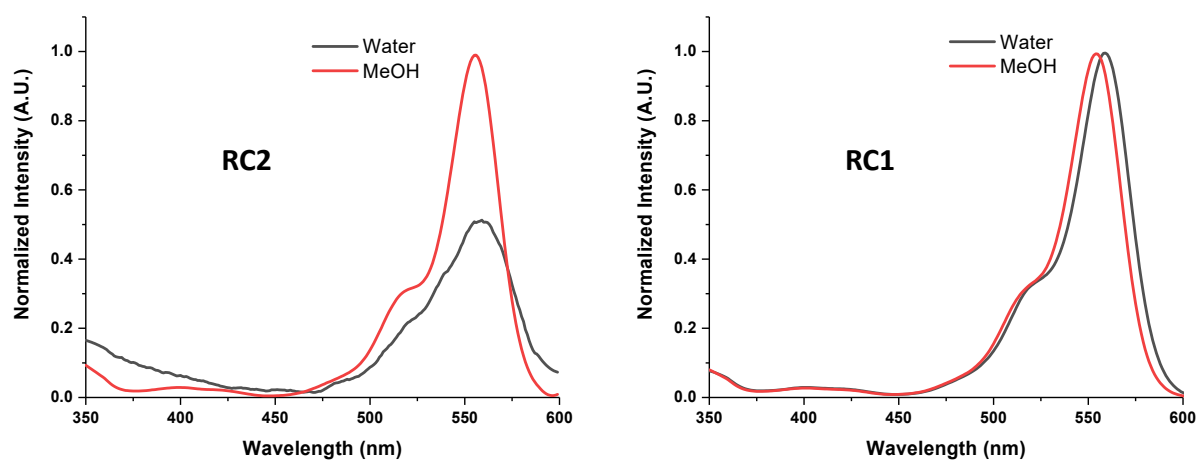

**Figure S1.** Excitation Spectra of **RC1** and **RC2** in water and methanol

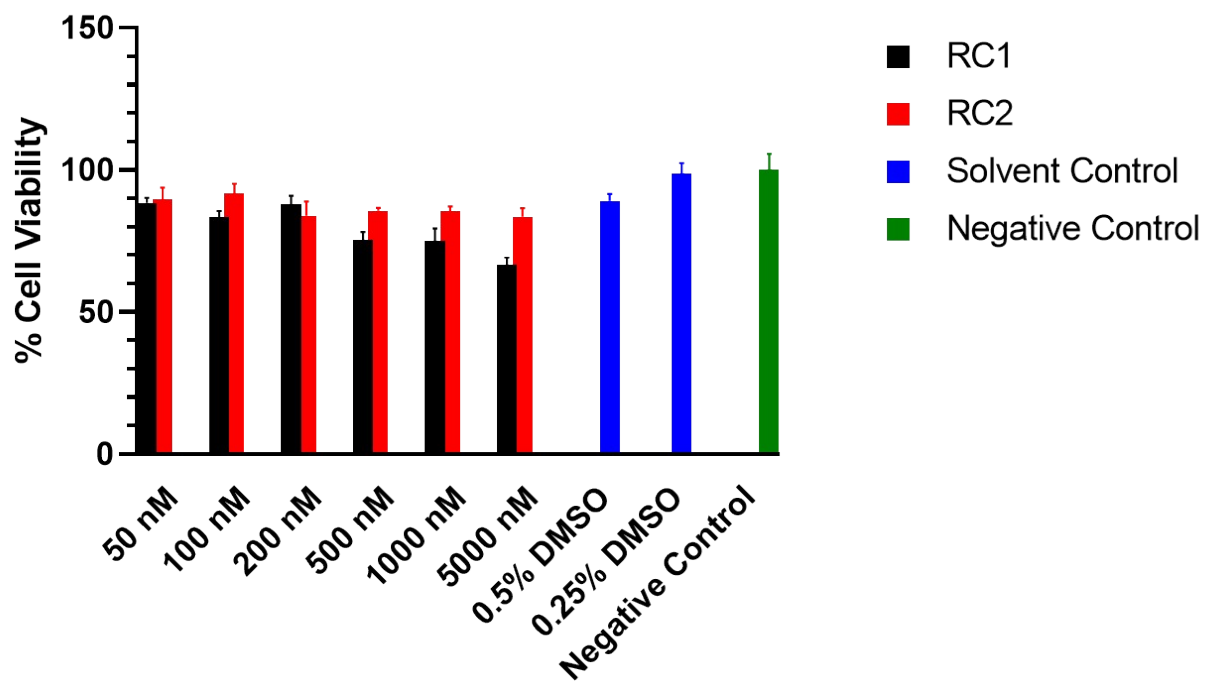

**Figure S2.** Cell cytotoxicity results of RC1 and RC2

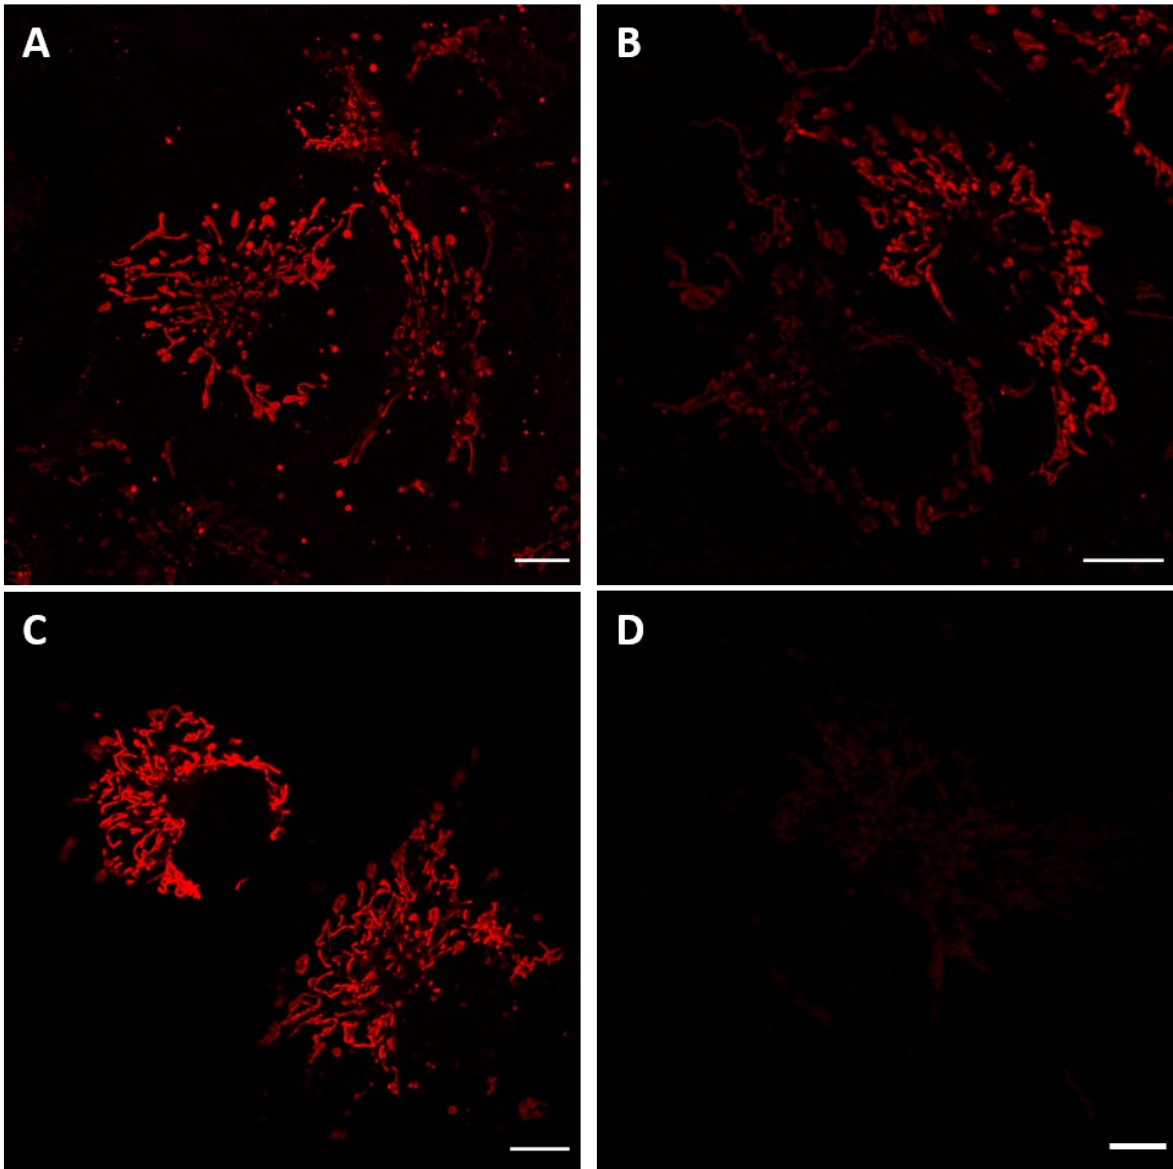

**Figure S3.** One colour images of serum stressed cells. **(A)** and **(C)** represent the serum-starved cells treated with **RC1** and **RC2**, respectively. **(B)** and **(D)** represent healthy cells treated with **RC1** and **RC2**, respectively. Scale factor: 10  $\mu\text{m}$

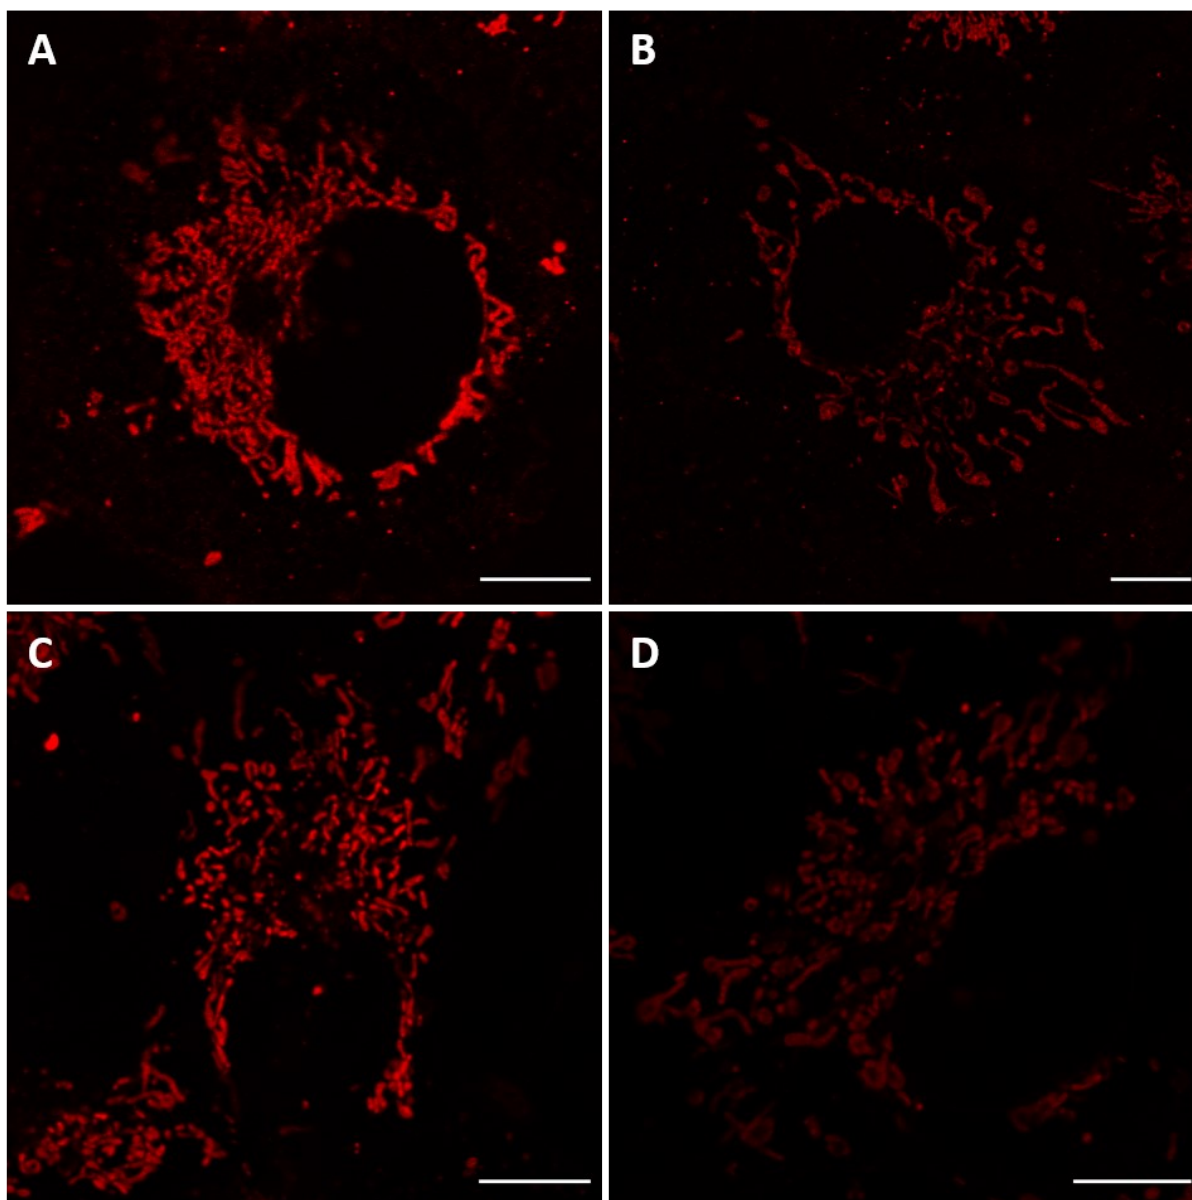

**Figure S4.** One colour image of oxidatively stressed cells. (A) and (C) represent the oxidative cells treated with RC1 and RC2, respectively. (B) and (D) represent healthy cells treated with RC1 and RC2, respectively. Scale factor: 10  $\mu\text{m}$

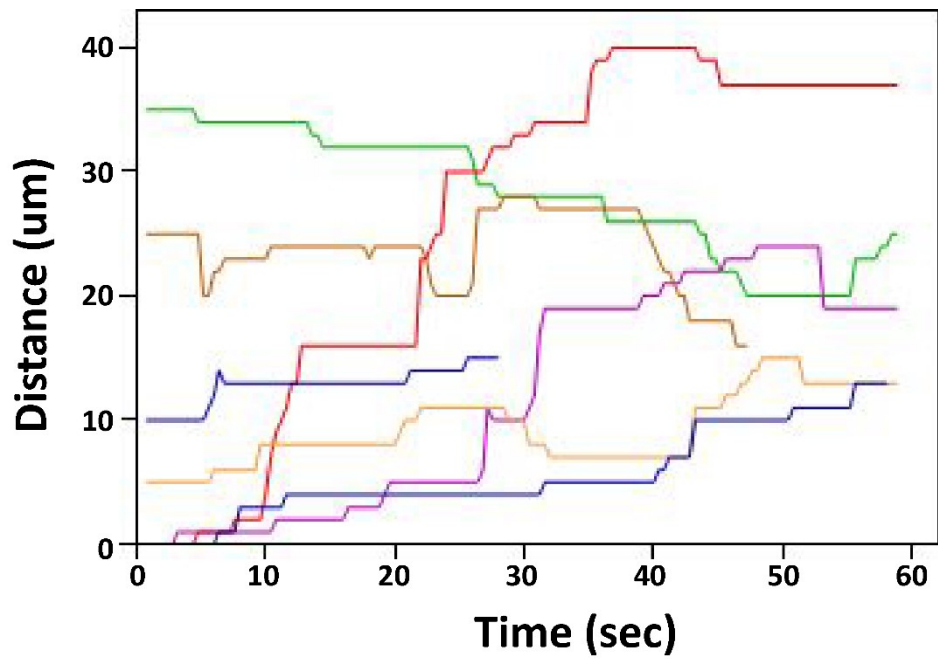

**Figure S5.** Representative tracks of typical bidirectional motion of mitochondria in cells labelled with RC2.

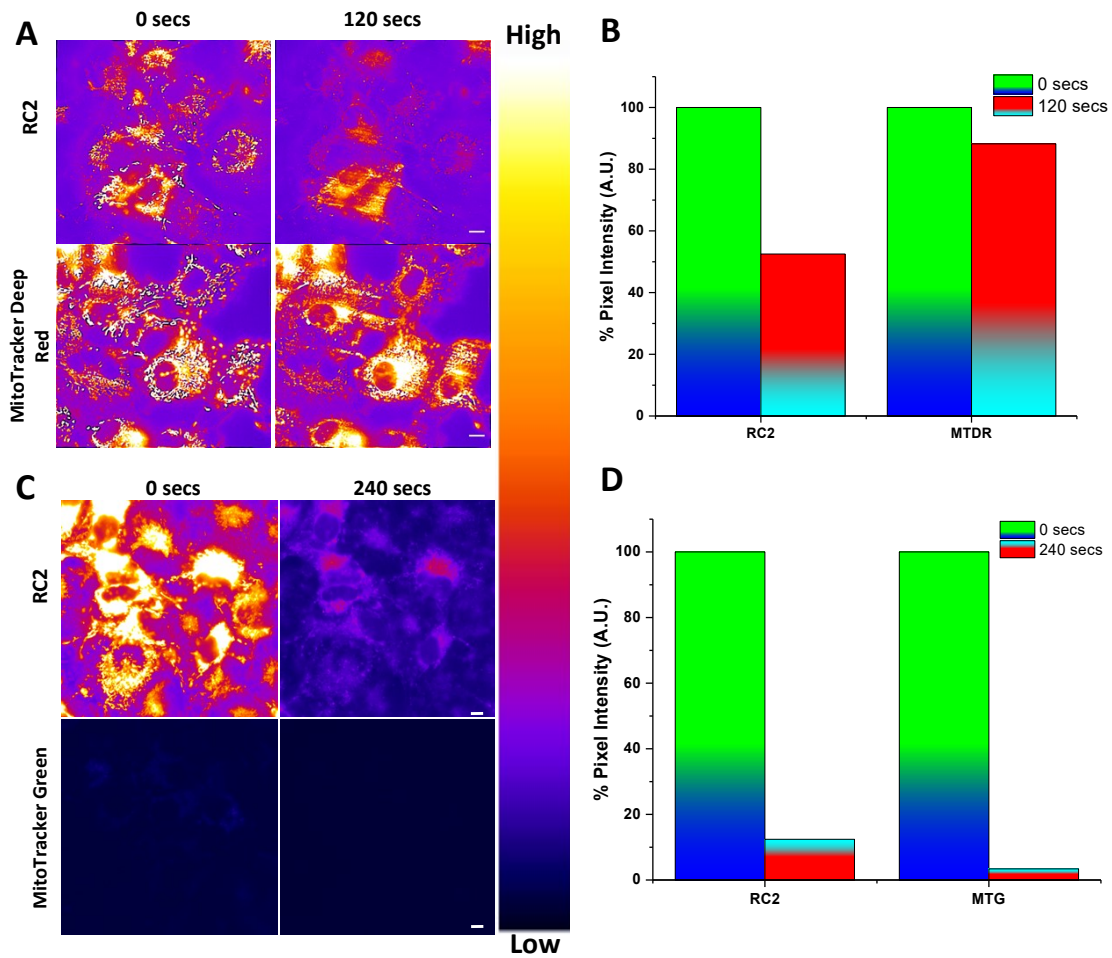

**Figure S6.** Comparative Brightness & Photostability Assay. (A) and (B) panels represent Cos-7 cells stained with RC2 and MitoTracker Deep red (MTDR); (C) and (D) panels represent Cos-7 cells stained with RC2 and MitoTracker green (MTG). Image intensities at 0 sec are considered as 100%-pixel intensity (for every probe channel) and comparative changes in pixel intensities are plotted to represent the photostability (B) & (D). scale bar: 10  $\mu$ m

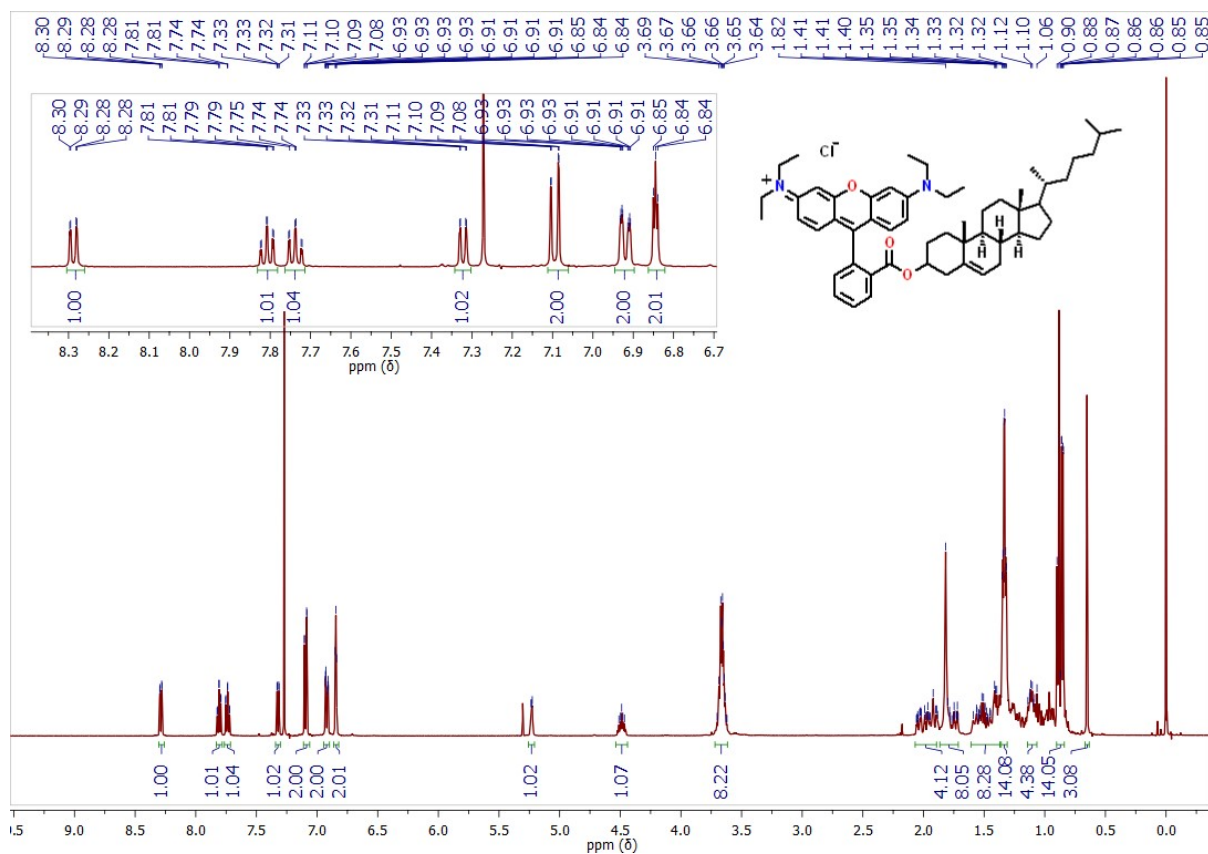

**Figure S7.**  $^1\text{H}$  NMR of compound RC1 in  $\text{CDCl}_3$ .



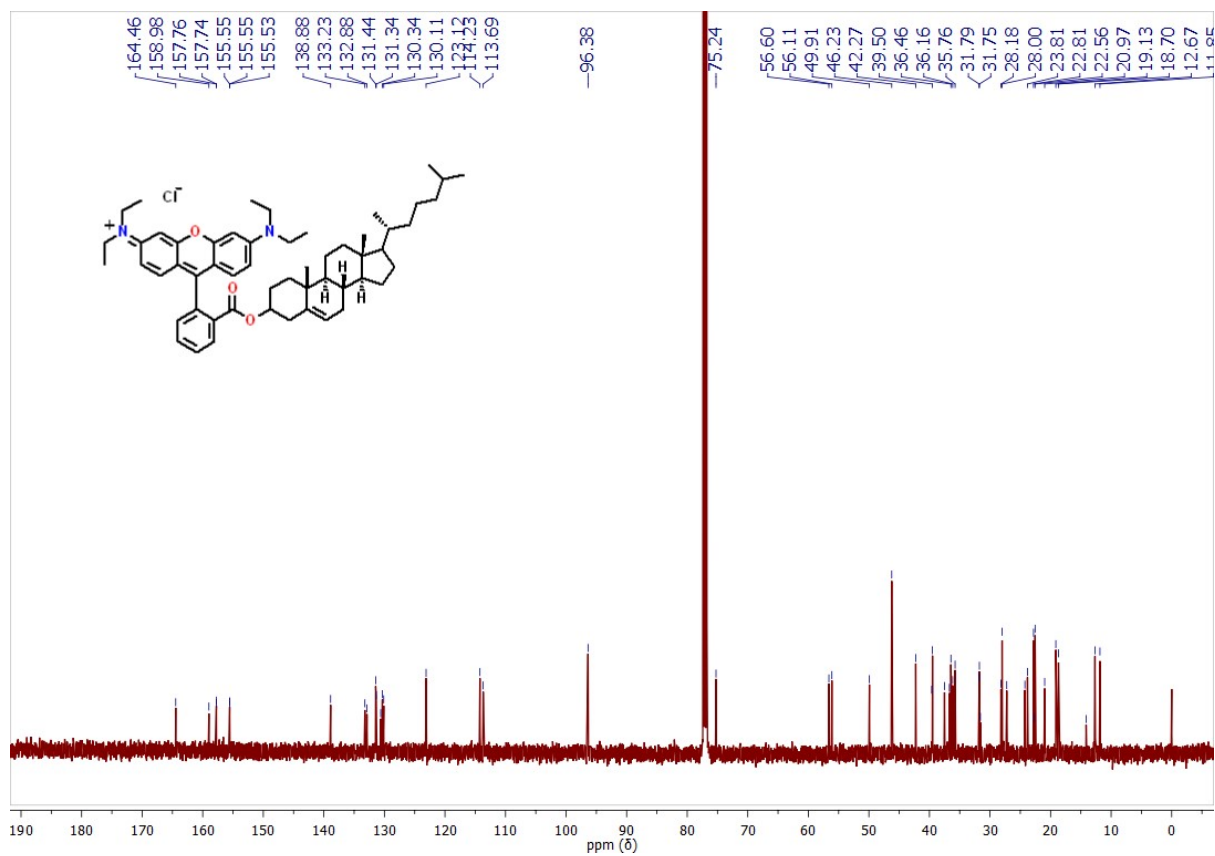

**Figure S8.**  $^{13}\text{C}$  NMR of compound RC1 in  $\text{CDCl}_3$ .



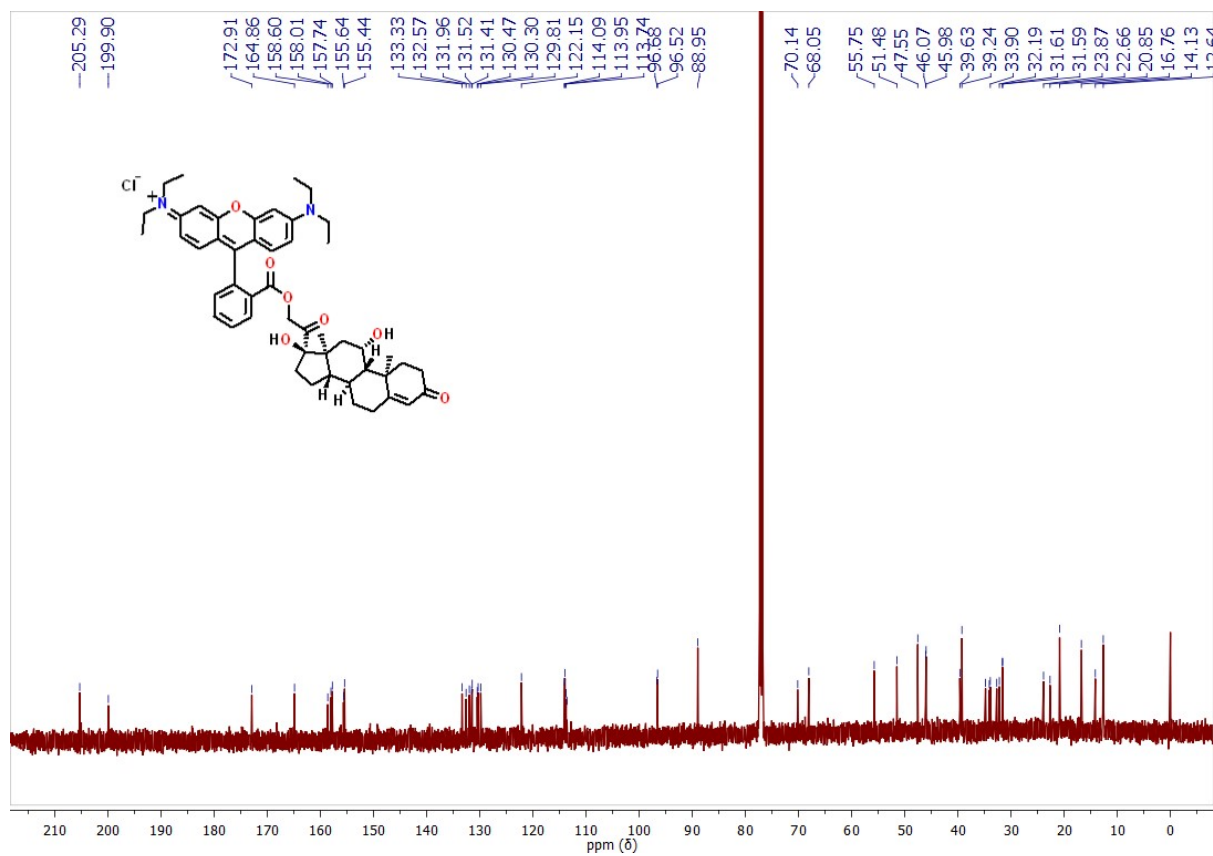

**Figure S10.** <sup>13</sup>C NMR of compound RC2 in CDCl<sub>3</sub>.

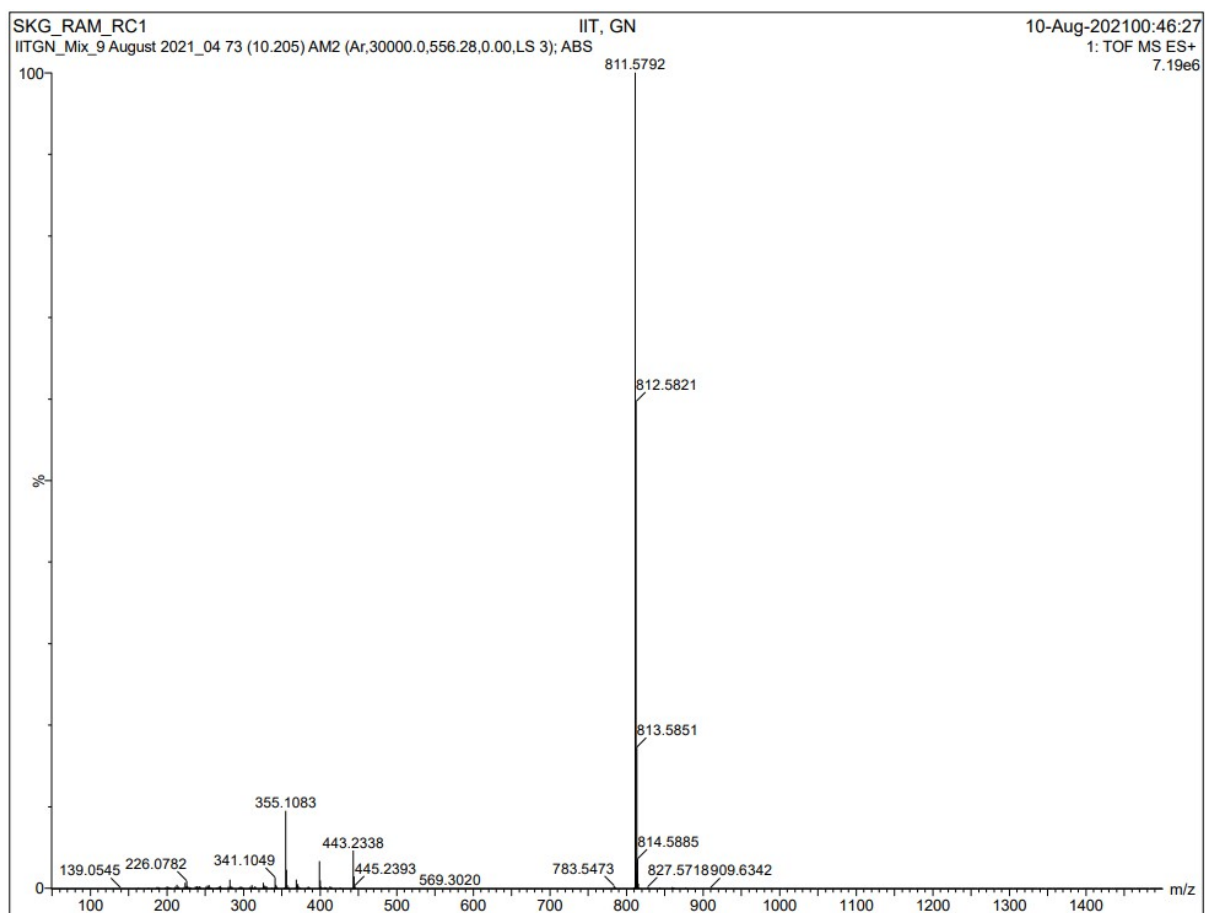

**Figure S11.** ESI mass profile of RC1 (RC1: HRMS (ESI) (m/z): [M]<sup>+</sup> calcd. for C<sub>55</sub>H<sub>75</sub>N<sub>2</sub>O<sub>3</sub>, 811.5773, found, 811.5792, difference 1.9 ppm (0.0019).

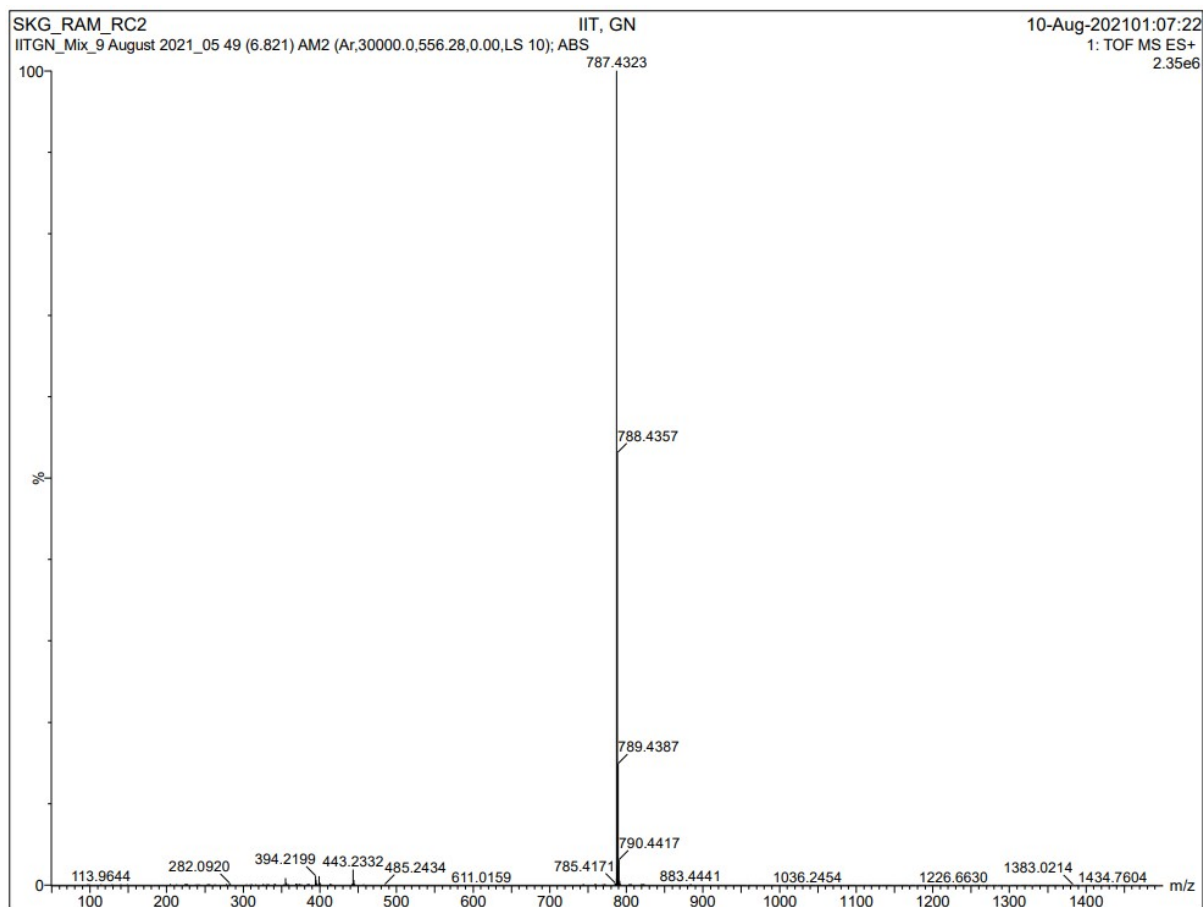

**Figure S12.** ESI mass profile of RC2 (RC2: HRMS (ESI) (m/z): [M]<sup>+</sup> calcd. for C<sub>49</sub>H<sub>59</sub>N<sub>2</sub>O<sub>7</sub>, 787.4317, found, 787.4323, difference 0.6 ppm (0.0006).

## References

1. R. Maltais, J. Roy and D. Poirier, *ACS Medicinal Chemistry Letters*, 2021, **12**, 822-826.
2. Z. Liu, S. G. Thacker, S. Fernandez-Castillejo, E. B. Neufeld, A. T. Remaley and R. Bittman, *Chembiochem*, 2014, **15**, 2087-2096.
3. D. M. C. Ramirez, W. W. Ogilvie and L. J. Johnston, *Biochimica et Biophysica Acta (BBA) - Biomembranes*, 2010, **1798**, 558-568.
4. V. Wiegand, T.-Y. Chang, J. F. Strauss, F. Fahrenholz and G. Gimpl, *The FASEB Journal*, 2003, **17**, 782-784.
5. T. Kawasaki, M. Maeda and A. Tsuji, *J Chromatogr*, 1979, **163**, 143-150.
6. N. Murase, S. I. Taniguchi, E. Takano, Y. Kitayama and T. Takeuchi, *J Mater Chem B*, 2016, **4**, 1770-1777.
7. T. Mukherjee, M. Aravintha Siva, K. Bajaj, V. Soppina and S. Kanvah, *J Photochem Photobiol B*, 2020, **203**, 111732.
